# Supplementary material for: Twin Screw Melt Granulation: A Single Step Approach for Developing Self-Emulsifying Drug Delivery System for Lipophilic Drugs
Source: MDPI journal article supplement (doi:10.3390/pharmaceutics15092267), 2023-09-01
Supplement: s1 [file s1]

Supplementary Table S1. A detailed description of the L-SEDDS formulations physical appearance and stability at 0 h and 48 h of storage

| Formulation | Oil (%w/w) | S/co-s | Initial appearance (0 h) | After 48 h       | Stability |
|-------------|------------|--------|--------------------------|------------------|-----------|
| F1          | 20         | 2:1    | Clear                    | Turbid           | Unstable  |
| F2          | 20         | 4:1    | Clear                    | Clear            | Stable    |
| F3          | 20         | 6:1    | Clear                    | Turbid           | Unstable  |
| F4          | 30         | 2:1    | Clear                    | Turbid           | Unstable  |
| F5          | 30         | 4:1    | Clear                    | Clear            | Stable    |
| F6          | 30         | 6:1    | Clear                    | Turbid           | Unstable  |
| F7          | 40         | 2:1    | Clear                    | Turbid           | Unstable  |
| F8          | 40         | 4:1    | Clear                    | Clear            | Stable    |
| F9          | 40         | 6:1    | Clear                    | Turbid           | Unstable  |
| F10         | 50         | 2:1    | Clear                    | Phase separation | Unstable  |
| F11         | 50         | 4:1    | Clear                    | Phase separation | Unstable  |
| F12         | 50         | 6:1    | Clear                    | Phase separation | Unstable  |

Supplementary Table S2. Stability of formulations when exposed to different pH conditions and dilutions.

| Formulation | pH 1.2 |     |      | pH 6.8 |     |      | Water |     |      |
|-------------|--------|-----|------|--------|-----|------|-------|-----|------|
|             | 50     | 100 | 1000 | 50     | 100 | 1000 | 50    | 100 | 1000 |
| F2          | √      | √   | √    | √      | √   | √    | √     | √   | √    |
| F5          | √      | √   | √    | √      | √   | √    | √     | √   | √    |
| F8          | √      | √   | X    | √      | √   | X    | √     | √   | X    |

√ - indicates stable formulation

X – indicates unstable formulations

Supplementary Table S3. Screening of suitable solid adsorbent carrier

| Formulation | Solid Carrier             | Adsorption Capacity (%w/w) | Carr's Index (C.I)      | Hausner's ratio         |
|-------------|---------------------------|----------------------------|-------------------------|-------------------------|
| S1 (F2)     | Neusilin <sup>®</sup> US2 | 0.50                       | 14.23 ± 0.12 (Good)     | 1.00 ± 0.22 (Excellent) |
|             | Starch 1500               | 1.67                       | 20.13 ± 0.65 (Passable) | 1.27 ± 0.24 (Passable)  |
|             | MCC PH 102                | 1.93                       | 26.41 ± 0.13 (Poor)     | 1.35 ± 0.11 (Poor)      |
| S2 (F5)     | Neusilin <sup>®</sup> US2 | 0.50                       | 14.65 ± 0.22 (Good)     | 0.98 ± 0.19 (Excellent) |
|             | Starch 1500               | 1.67                       | 21.11 ± 0.15 (Passable) | 1.28 ± 0.08 (Passable)  |
|             | MCC PH 102                | 1.93                       | 27.33 ± 0.27 (Poor)     | 1.36 ± 0.21 (Poor)      |

Supplementary Table S4. Process parameters of the TSMG process employed for developing S-  
SEDDS formulations

| <b>Process Parameters</b> | <b>S1</b> | <b>S2</b> |
|---------------------------|-----------|-----------|
| Zone - 2 (°C)             | 25        | 25        |
| Zone 3 - 8 (°C)           | 80        | 80        |
| Die (°C)                  | 25        | 25        |
| Screw (rpm)               | 50        | 50        |
| Feed rate (g/min)         | 3.0 - 3.5 | 3.0 - 3.5 |
| Torque (%)                | 10 - 12   | 10 - 12   |
| Residence time (Sec)      | 80 - 90   | 80 - 90   |

Supplementary Table S5. Various physicochemical properties of compressed tablets (T1, T2)

| Formulation    | Disintegrant            | Concentration<br>(%w/w) | Compressional<br>Force (kN) | Hardness<br>(kP) | Disintegration<br>Time (Sec) | Weight<br>variation (mg) | Friability<br>(%) | Thickness<br>(mm) |
|----------------|-------------------------|-------------------------|-----------------------------|------------------|------------------------------|--------------------------|-------------------|-------------------|
| <b>T1 (S1)</b> | AC-DI-SOL               | 5.00                    | 1.5 kN                      | 9.45 ± 0.65      | 300.45 ± 15.23               | 396.34 ± 2.45            | 0.28              | 3.45 ± 0.34       |
|                | Sodium starch glycolate | 5.00                    | 1.5 kN                      | 9.66 ± 0.31      | 250.21 ± 23.44               | 394.33 ± 1.99            | 0.31              | 3.38 ± 0.24       |
|                | Kollidon -CL            | 5.00                    | 1.5 kN                      | 8.79 ± 0.11      | 475.33 ± 17.45               | 395.33 ± 3.45            | 0.29              | 3.25 ± 0.33       |
| <b>T1 (S1)</b> | AC-DI-SOL               | 10.00                   | 1.7 kN                      | 9.26 ± 0.12      | 45.18 ± 10.45                | 415.67 ± 2.78            | 0.41              | 4.53 ± 0.45       |
|                | Sodium starch glycolate | 10.00                   | 1.7 kN                      | 9.32 ± 0.33      | 465.34 ± 24.11               | 414.45 ± 3.67            | 0.44              | 4.50 ± 0.31       |
|                | Kollidon -CL            | 10.00                   | 1.7 kN                      | 9.54 ± 0.41      | 180.31 ± 33.61               | 415.21 ± 3.11            | 0.51              | 4.48 ± 0.22       |
| <b>T2 (S2)</b> | AC-DI-SOL               | 5.00                    | 1.5 kN                      | 9.21 ± 0.11      | 290.21 ± 22.11               | 395.23 ± 1.44            | 0.26              | 3.38 ± 0.11       |
|                | Sodium starch glycolate | 5.00                    | 1.5 kN                      | 8.99 ± 0.21      | 267.32 ± 11.21               | 396.33 ± 2.45            | 0.32              | 3.23 ± 0.35       |
|                | Kollidon -CL            | 5.00                    | 1.5 kN                      | 9.65 ± 0.47      | 483.34 ± 9.67                | 395.31 ± 2.11            | 0.30              | 3.40 ± 0.45       |
| <b>T2 (S2)</b> | AC-DI-SOL               | 10.00                   | 1.7 kN                      | 9.33 ± 0.61      | 47.45 ± 16.43                | 416.77 ± 3.11            | 0.45              | 4.52 ± 0.33       |
|                | Sodium starch glycolate | 10.00                   | 1.7 kN                      | 8.99 ± 0.11      | 475.55 ± 19.33               | 415.45 ± 2.66            | 0.46              | 4.45 ± 0.23       |
|                | Kollidon -CL            | 10.00                   | 1.7 kN                      | 9.11 ± 0.23      | 200.45 ± 21.41               | 414.33 ± 3.45            | 0.43              | 4.50 ± 0.11       |

Supplementary Table S6. Physiochemical characterization of SEDDS tablets upon storage at the long term and accelerated stability conditions for 06 months

| <b>Storage<br/>(25/60)</b> | <b>Formulation</b> | <b>Tablet<br/>Hardness</b> | <b>Tablet<br/>Friability</b> | <b>Disintegration<br/>Time (Sec)</b> | <b>Drug Content<br/>(%)</b> | <b>Particle Size<br/>(nm)</b> | <b>PDI</b>  | <b>f2</b> |
|----------------------------|--------------------|----------------------------|------------------------------|--------------------------------------|-----------------------------|-------------------------------|-------------|-----------|
| 1 M                        | T1                 | 9.45 ± 0.32                | 0.45                         | 40.45 ± 10.23                        | 98.45 ± 2.67                | 15.67 ± 0.67                  | 0.11 ± 0.02 | 98        |
|                            | T2                 | 8.89 ± 0.45                | 0.48                         | 42.33 ± 9.45                         | 99.78 ± 1.89                | 17.45 ± 0.33                  | 0.13 ± 0.03 | 97        |
| 3 M                        | T1                 | 9.34 ± 0.21                | 0.43                         | 50.45 ± 12.31                        | 101.45 ± 0.89               | 16.47 ± 0.31                  | 0.09 ± 0.01 | 97        |
|                            | T2                 | 9.11 ± 0.45                | 0.40                         | 49.67 ± 10.11                        | 99.71 ± 2.76                | 18.45 ± 0.63                  | 0.11 ± 0.04 | 95        |
| 6 M                        | T1                 | 9.55 ± 0.23                | 0.51                         | 45.21 ± 19.67                        | 98.89 ± 1.41                | 15.89 ± 0.77                  | 0.13 ± 0.06 | 98        |
|                            | T2                 | 9.65 ± 0.43                | 0.49                         | 48.61 ± 21.56                        | 99.67 ± 2.11                | 18.43 ± 0.39                  | 0.16 ± 0.02 | 96        |

  

| <b>Storage<br/>(40/75)</b> | <b>Formulation</b> | <b>Tablet<br/>Hardness</b> | <b>Tablet<br/>Friability</b> | <b>Disintegration<br/>Time (Sec)</b> | <b>Drug Content<br/>(%)</b> | <b>Particle Size<br/>(nm)</b> | <b>PDI</b>  | <b>f2</b> |
|----------------------------|--------------------|----------------------------|------------------------------|--------------------------------------|-----------------------------|-------------------------------|-------------|-----------|
| 1 M                        | T1                 | 9.32 ± 0.45                | 0.43                         | 45.55 ± 9.23                         | 101.33 ± 1.30               | 16.47 ± 0.37                  | 0.09 ± 0.01 | 97        |
|                            | T2                 | 9.89 ± 0.33                | 0.41                         | 41.43 ± 8.45                         | 99.70 ± 2.80                | 17.40 ± 0.45                  | 0.10 ± 0.04 | 96        |
| 3 M                        | T1                 | 8.34 ± 0.20                | 0.55                         | 51.35 ± 11.31                        | 99.42 ± 0.50                | 15.40 ± 0.35                  | 0.07 ± 0.02 | 95        |
|                            | T2                 | 9.23 ± 0.11                | 0.57                         | 50.67 ± 10.15                        | 100.71 ± 1.76               | 19.45 ± 0.60                  | 0.12 ± 0.03 | 97        |
| 6 M                        | T1                 | 8.45 ± 0.13                | 0.49                         | 48.21 ± 20.67                        | 101.89 ± 2.41               | 15.50 ± 0.55                  | 0.09 ± 0.05 | 96        |
|                            | T2                 | 8.45 ± 0.23                | 0.47                         | 47.50 ± 20.45                        | 98.67 ± 1.09                | 18.45 ± 0.89                  | 0.13 ± 0.03 | 95        |

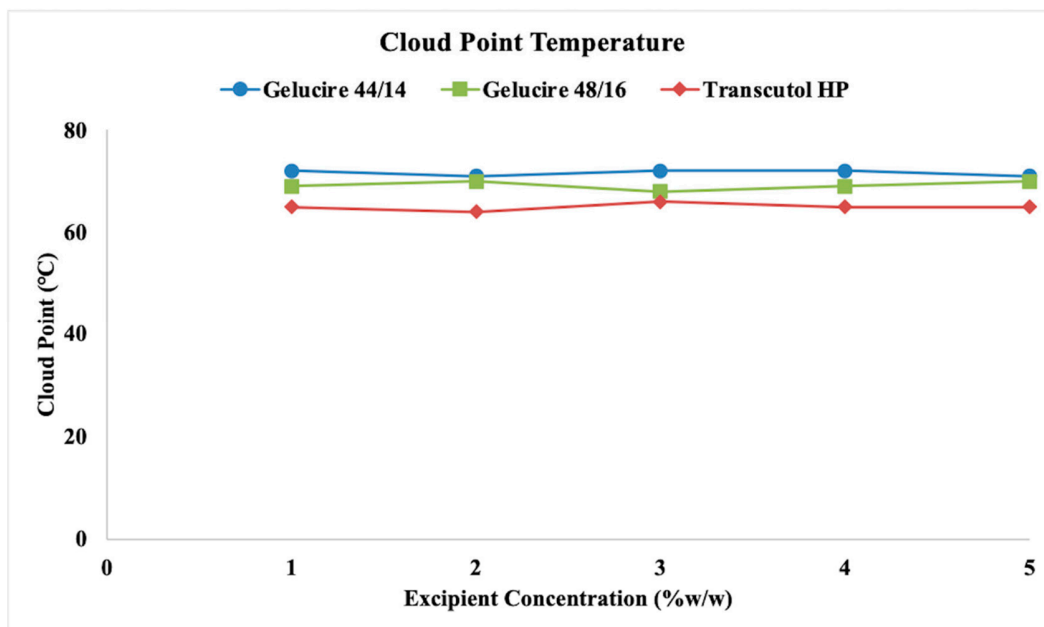

Supplementary Figure S1. Cloud point temperature of pure formulation excipients (Gelucire<sup>®</sup> 44/14, Gelucire<sup>®</sup> 48/16, and Transcutol<sup>®</sup> HP) with concentrations ranging from 1 – 5 %w/w in water.

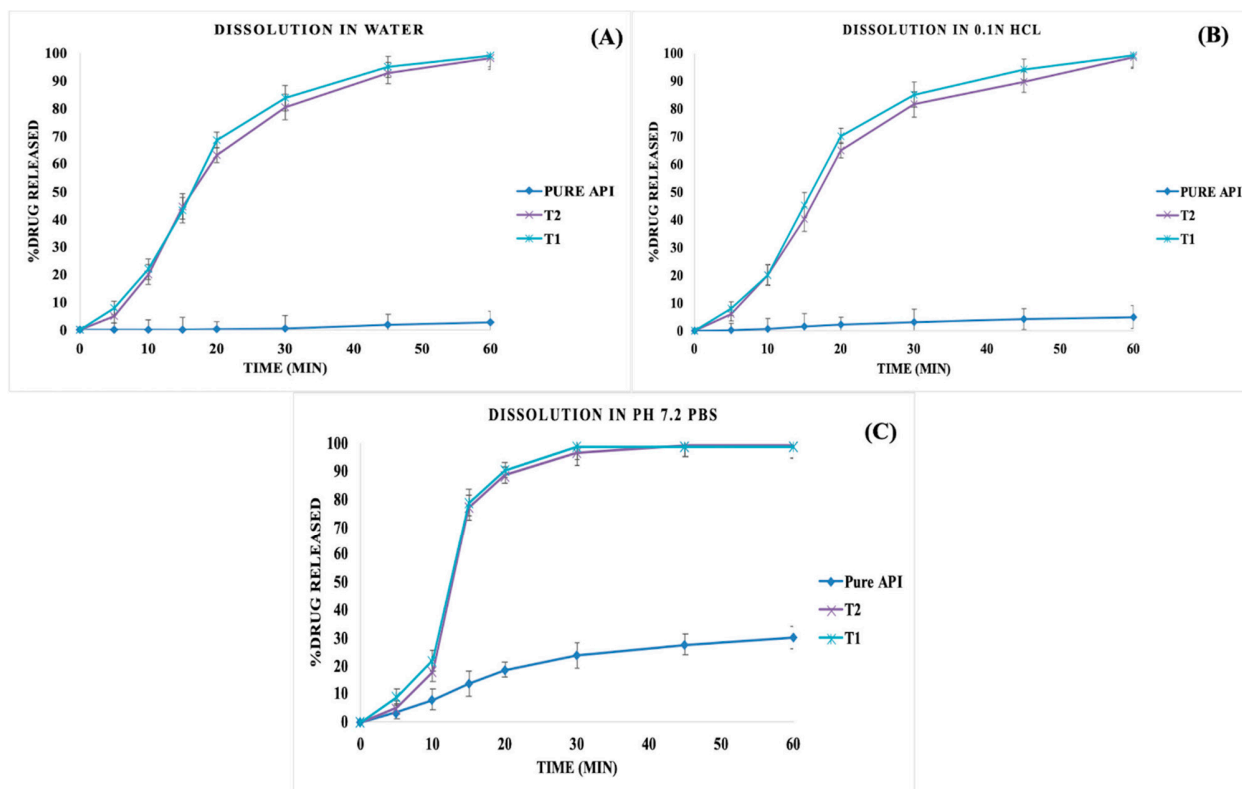

Supplementary Figure S2. *In vitro* drug release profiles of SEDDS tablets in (A) water, (B) 0.1N HCl, and (C) pH 7.2 PBS.



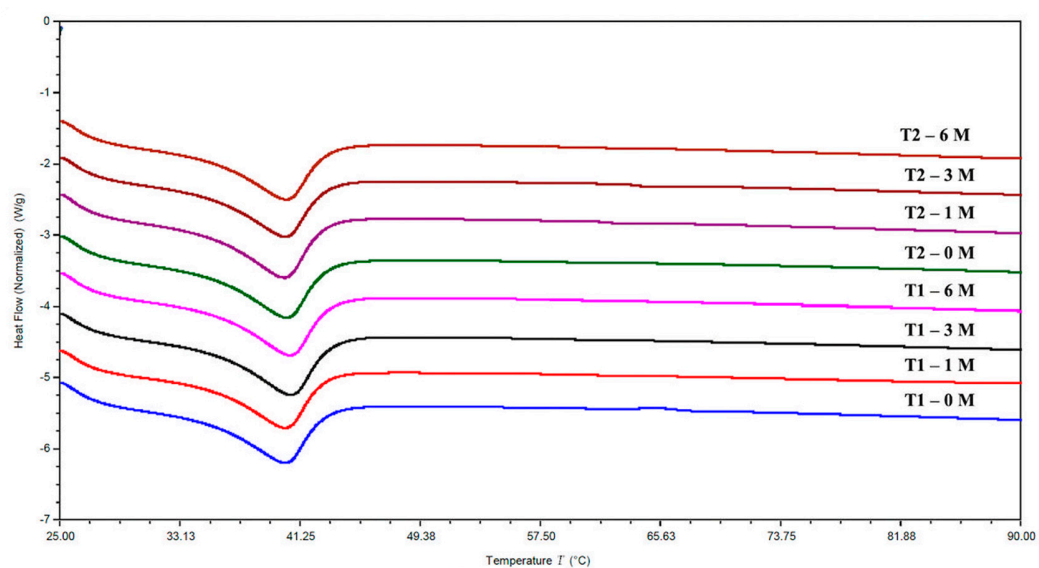

Supplementary Figure S3. Thermal characterization of SEDDS tablets after storage at the long term and accelerated conditions for 06 months

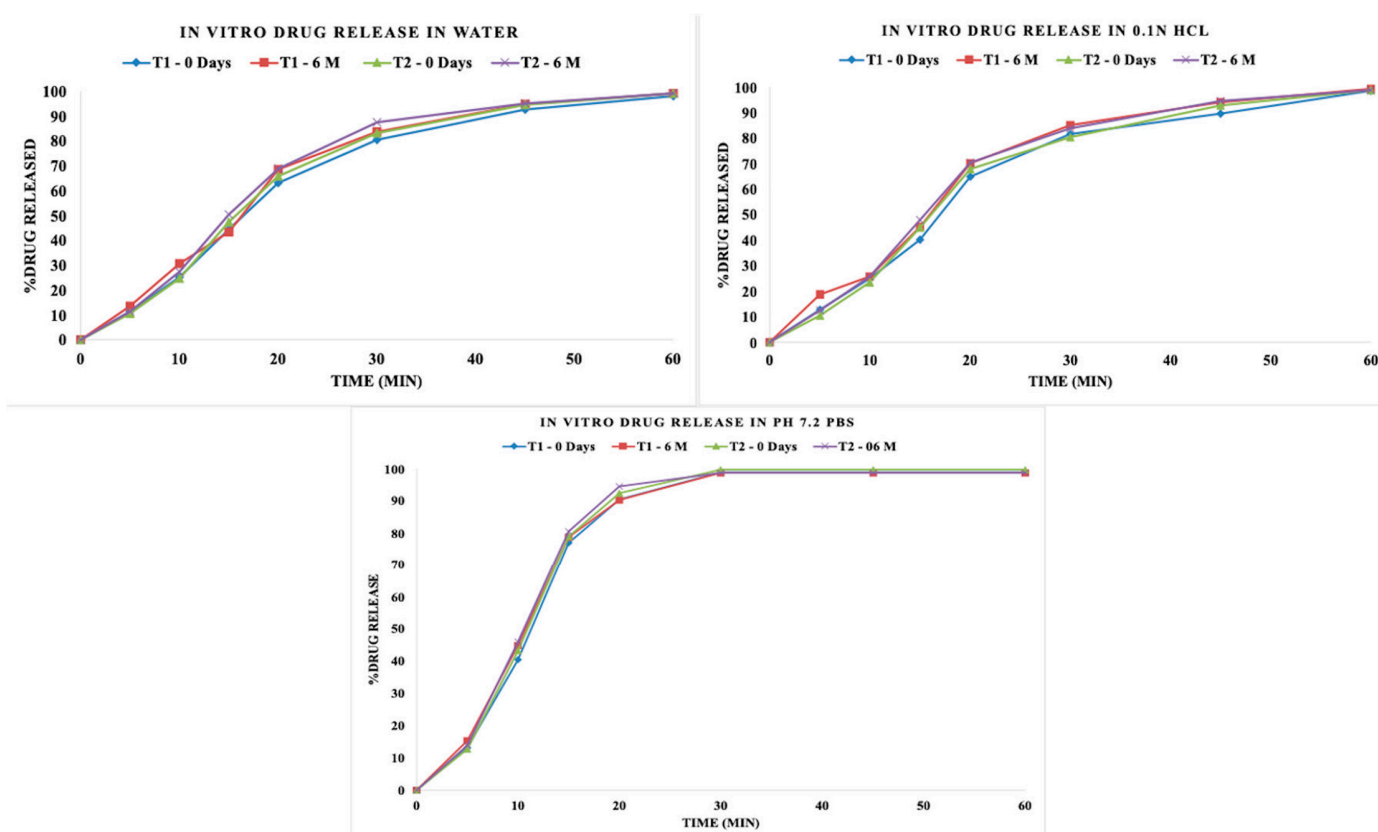

Supplementary Figure S4. *In vitro* dissolution profiles of SEDDS tablets upon storage at the long term and accelerated conditions for 06 months.
